# Supplementary material for: AI-driven design of Novel EGFR Inhibitors with Enhanced Potency and Drug-Like Properties
Source: Research Square preprint supplement (doi:10.21203/rs.3.rs-6888580/v1), 2025-06-30
Supplement: Supplementary file 1 [file 41330edc43022a139fab9e45.docx]

**Supplementary Table 1.** All dataset molecules collected from ChEMBL

| **Molecule_chembl_id** | **Canonical_smiles** | **IC50_nM** | **QED** | **MW** | **LogP** | **HBD** | **HBA** | **TPSA** | **NumRotatableBonds** | **Activity_Class** |
| --- | --- | --- | --- | --- | --- | --- | --- | --- | --- | --- |
| CHEMBL52765 | Nc1ccc2ncnc(Nc3cccc(Br)c3)c2c1 | 44 | 0.707558 | 315.174 | 3.7181 | 2 | 4 | 63.83 | 2 | potent |
| CHEMBL336264 | C=CS(=O)(=O)c1cc2c(Nc3cccc(Br)c3)ncnc2cn1 | 0.43 | 0.733518 | 391.25 | 3.4481 | 1 | 6 | 84.84 | 4 | potent |
| CHEMBL345077 | C=C[S+]([O-])c1cc2c(Nc3cccc(Br)c3)ncnc2cn1 | 4.6 | 0.702846 | 375.251 | 3.782 | 1 | 5 | 73.76 | 4 | potent |
| CHEMBL29197 | COc1cc2ncnc(Nc3cccc(Br)c3)c2cc1OC | 0.025 | 0.757494 | 360.211 | 4.1531 | 1 | 5 | 56.27 | 4 | potent |
| CHEMBL290096 | Brc1cccc(Nc2ncnc3ccccc23)c1 | 27 | 0.772775 | 300.159 | 4.1359 | 1 | 3 | 37.81 | 2 | potent |
| CHEMBL341319 | CN(CCO)c1cc2ncnc(Nc3cccc(Br)c3)c2cn1 | 2.6 | 0.71549 | 374.242 | 2.9594 | 2 | 6 | 74.17 | 5 | potent |
| CHEMBL54400 | CNc1cc2ncnc(Nc3cccc(Br)c3)c2cn1 | 0.13 | 0.768616 | 330.189 | 3.5726 | 2 | 5 | 62.73 | 3 | potent |
| CHEMBL92812 | CNc1ccc2c(Nc3cccc(Br)c3)ncnc2c1 | 4 | 0.756878 | 329.201 | 4.1776 | 2 | 4 | 49.84 | 3 | potent |
| CHEMBL420624 | Nc1ccc2c(Nc3cccc(Br)c3)ncnc2c1 | 0.1 | 0.707558 | 315.174 | 3.7181 | 2 | 4 | 63.83 | 2 | potent |
| CHEMBL127082 | CNc1cc2ncnc(Nc3cccc(C)c3)c2cn1 | 1.4 | 0.761492 | 265.32 | 3.11852 | 2 | 5 | 62.73 | 3 | potent |
| CHEMBL53428 | CN(C)c1cc2ncnc(Nc3cccc(Br)c3)c2cn1 | 0.09 | 0.786868 | 344.216 | 3.5969 | 1 | 5 | 53.94 | 3 | potent |
| CHEMBL52076 | Nc1cc2ncnc(Nc3cccc(Br)c3)c2cn1 | 10 | 0.759476 | 316.162 | 3.1131 | 2 | 5 | 76.72 | 2 | potent |
| CHEMBL415738 | Cc1cccc(Nc2cc(NCCO)ncn2)c1 | 1 | 0.749431 | 244.298 | 1.93282 | 3 | 5 | 70.07 | 5 | potent |
| CHEMBL329672 | Clc1cccc(Nc2ncnc3ccccc23)c1 | 23 | 0.751361 | 255.708 | 4.0268 | 1 | 3 | 37.81 | 2 | potent |
| CHEMBL169390 | Nc1ncnc2c1c(-c1cccc(O)c1)cn2C1CCCC1 | 80 | 0.758024 | 294.358 | 3.5012 | 2 | 5 | 76.96 | 2 | potent |
| CHEMBL355982 | Brc1cccc(Nc2ncnc3sccc23)c1 | 35 | 0.770912 | 306.188 | 4.1974 | 1 | 4 | 37.81 | 2 | potent |
| CHEMBL97162 | COc1nccc(-c2c(-c3ccc(F)cc3)ncn2[C@H]2CC[C@H](O)CC2)n1 | 83 | 0.761231 | 368.412 | 3.6308 | 1 | 6 | 73.06 | 4 | potent |
| CHEMBL345294 | Brc1cccc(Nc2ncnc3ccsc23)c1 | 11 | 0.770912 | 306.188 | 4.1974 | 1 | 4 | 37.81 | 2 | potent |
| CHEMBL545541 | COc1cc2ncnc(NCc3ccccc3)c2cc1OC.Cl | 4 | 0.772527 | 331.803 | 3.6809 | 1 | 5 | 56.27 | 5 | potent |
| CHEMBL541586 | COc1cc2ncnc(Nc3cccc(F)c3)c2cc1OC.Cl | 25 | 0.781971 | 335.766 | 3.9515 | 1 | 5 | 56.27 | 4 | potent |
| CHEMBL540068 | COc1cc2ncnc(Nc3cccc(Cl)c3)c2cc1OC.Cl | 30 | 0.751035 | 352.221 | 4.4658 | 1 | 5 | 56.27 | 4 | potent |
| CHEMBL135853 | COc1cc2ncnc(Oc3cccc(Cl)c3)c2cc1OC | 20 | 0.72523 | 316.744 | 4.0927 | 0 | 5 | 53.47 | 4 | potent |
| CHEMBL542484 | COc1cc2ncnc(Nc3ccccc3)c2cc1OC.Cl | 50 | 0.7926 | 317.776 | 3.8124 | 1 | 5 | 56.27 | 4 | potent |
| CHEMBL555321 | Cl.Clc1cccc(Nc2ncnc3ccccc23)c1 | 50 | 0.757987 | 292.169 | 4.4486 | 1 | 3 | 37.81 | 2 | potent |
| CHEMBL56802 | COc1cc2ncnc(Nc3cccc(C)c3)c2cc1OC | 5 | 0.795048 | 295.342 | 3.69902 | 1 | 5 | 56.27 | 4 | potent |
| CHEMBL301018 | COc1cc2ncnc(Nc3ccc(F)c(Cl)c3)c2cc1OC | 9 | 0.775739 | 333.75 | 4.1831 | 1 | 5 | 56.27 | 4 | potent |
| CHEMBL7917 | COc1cc2ncnc(Nc3cccc(Cl)c3)c2cc1OC | 6 | 0.786994 | 315.76 | 4.044 | 1 | 5 | 56.27 | 4 | potent |
| CHEMBL7827 | O=c1c(-c2cccc(Cl)c2)coc2cc(O)cc(O)c12 | 95 | 0.71849 | 288.686 | 3.5246 | 2 | 4 | 70.67 | 1 | potent |
| CHEMBL440453 | COc1cc(O)c2c(O)c(-c3cccc(Cl)c3)cnc2c1 | 38 | 0.751429 | 301.729 | 3.975 | 2 | 4 | 62.58 | 2 | potent |
| CHEMBL7866 | COC(=O)Cn1cc(-c2cccc(Cl)c2)c(=O)c2c(O)cc(OC)cc21 | 64 | 0.710392 | 373.792 | 3.2091 | 1 | 6 | 77.76 | 4 | potent |
| CHEMBL161956 | CN(CCO)c1cc2c(Nc3cccc(Br)c3)ncnc2cn1 | 0.22 | 0.71549 | 374.242 | 2.9594 | 2 | 6 | 74.17 | 5 | potent |
| CHEMBL165495 | Cc1cccc(Nc2ncnc3cnc(N)cc23)c1 | 3.1 | 0.731828 | 251.293 | 2.65902 | 2 | 5 | 76.72 | 2 | potent |
| CHEMBL162719 | CN1CCN(c2cc3c(Nc4cccc(Br)c4)ncnc3cn2)CC1 | 6.4 | 0.729762 | 399.296 | 3.2827 | 1 | 6 | 57.18 | 3 | potent |
| CHEMBL162821 | CNc1cc2c(Nc3cccc(C)c3)ncnc2cn1 | 0.45 | 0.761492 | 265.32 | 3.11852 | 2 | 5 | 62.73 | 3 | potent |
| CHEMBL53940 | CNc1cc2c(Nc3ccccc3)ncnc2cn1 | 9 | 0.74909 | 251.293 | 2.8101 | 2 | 5 | 62.73 | 3 | potent |
| CHEMBL165788 | CNc1cc2c(Nc3cccc(C(F)(F)F)c3)ncnc2cn1 | 1.1 | 0.768047 | 319.29 | 3.8289 | 2 | 5 | 62.73 | 3 | potent |
| CHEMBL166154 | CNc1cc2c(Nc3cccc(Cl)c3)ncnc2cn1 | 0.19 | 0.771438 | 285.738 | 3.4635 | 2 | 5 | 62.73 | 3 | potent |
| CHEMBL163188 | Cc1cccc(Nc2ncnc3cnc(N(C)C)cc23)c1 | 2.8 | 0.79789 | 279.347 | 3.14282 | 1 | 5 | 53.94 | 3 | potent |
| CHEMBL31815 | C=CC(=O)Nc1ccc2ncnc(Nc3cccc(C)c3)c2c1 | 0.42 | 0.71933 | 304.353 | 3.80632 | 2 | 4 | 66.91 | 4 | potent |
| CHEMBL28418 | C=CC(=O)Nc1ccc2ncnc(Nc3ccc(F)c(Cl)c3)c2n1 | 0.75 | 0.706202 | 343.749 | 3.6854 | 2 | 5 | 79.8 | 4 | potent |
| CHEMBL297968 | C=CC(=O)Nc1ccc2c(Nc3cccc(C)c3)ncnc2c1 | 1.6 | 0.71933 | 304.353 | 3.80632 | 2 | 4 | 66.91 | 4 | potent |
| CHEMBL326596 | COc1ccc2c(NCc3ccccc3)ncnc2c1 | 58 | 0.78627 | 265.316 | 3.2505 | 1 | 4 | 47.04 | 4 | potent |
| CHEMBL52913 | C=CC(=O)Nc1ccc2c(Nc3cccc(Cl)c3)ncnc2c1 | 0.25 | 0.707374 | 324.771 | 4.1513 | 2 | 4 | 66.91 | 4 | potent |
| CHEMBL92825 | Ic1cccc(Nc2ncnc3ccccc23)c1 | 80 | 0.712963 | 347.159 | 3.978 | 1 | 3 | 37.81 | 2 | potent |
| CHEMBL93181 | COc1ccc2c(Nc3cccc(Br)c3)ncnc2c1 | 10 | 0.783829 | 330.185 | 4.1445 | 1 | 4 | 47.04 | 3 | potent |
| CHEMBL325245 | COc1cc2ncnc(NCc3ccccc3)c2cc1OC | 10 | 0.782683 | 295.342 | 3.2591 | 1 | 5 | 56.27 | 5 | potent |
| CHEMBL115745 | COc1cc2ncnc(NCc3ccccc3)c2cc1O | 56 | 0.769266 | 281.315 | 2.9561 | 2 | 5 | 67.27 | 4 | potent |
| CHEMBL65250 | C#Cc1cc(Nc2ncnc3cc(OC)c(OC)cc23)ccc1F | 4 | 0.744696 | 323.327 | 3.511 | 1 | 5 | 56.27 | 4 | potent |
| CHEMBL54088 | C=CC(=O)Nc1cc2c(Nc3cccc(C)c3)ncnc2cn1 | 0.48 | 0.723537 | 305.341 | 3.20132 | 2 | 5 | 79.8 | 4 | potent |
| CHEMBL53555 | C=CC(=O)Nc1cc2c(Nc3ccc(F)c(Cl)c3)ncnc2cn1 | 0.77 | 0.706202 | 343.749 | 3.6854 | 2 | 5 | 79.8 | 4 | potent |
| CHEMBL53637 | C=CC(=O)Nc1ccc2ncnc(Nc3cccc(Cl)c3)c2c1 | 1.6 | 0.707374 | 324.771 | 4.1513 | 2 | 4 | 66.91 | 4 | potent |
| CHEMBL419137 | COc1cc2ncnc(NC3CC3c3ccccc3)c2cc1OC | 10 | 0.777704 | 321.38 | 3.615 | 1 | 5 | 56.27 | 5 | potent |
| CHEMBL328106 | COc1cc2ncnc(Nc3ccc(Br)cc3)c2cc1OC | 0.96 | 0.757494 | 360.211 | 4.1531 | 1 | 5 | 56.27 | 4 | potent |
| CHEMBL316064 | COc1cc2ncnc(Nc3cccc(C(F)(F)F)c3)c2cc1OC | 0.24 | 0.756087 | 349.312 | 4.4094 | 1 | 5 | 56.27 | 4 | potent |
| CHEMBL93302 | Oc1ccc2c(Nc3cccc(Br)c3)ncnc2c1 | 4.7 | 0.753997 | 316.158 | 3.8415 | 2 | 4 | 58.04 | 2 | potent |
| CHEMBL94191 | COc1cc2ncnc(Nc3ccccc3)c2cc1OC | 29 | 0.79404 | 281.315 | 3.3906 | 1 | 5 | 56.27 | 4 | potent |
| CHEMBL328879 | COc1ccc2ncnc(Nc3ccccc3)c2c1 | 55 | 0.774784 | 251.289 | 3.382 | 1 | 4 | 47.04 | 3 | potent |
| CHEMBL96780 | COc1cc2ncnc(Nc3cccc(Br)c3)c2cc1N | 3.8 | 0.707946 | 345.2 | 3.7267 | 2 | 5 | 73.06 | 3 | potent |
| CHEMBL90013 | CN(C)c1ccc2c(Nc3cccc(Br)c3)ncnc2c1 | 11 | 0.7738 | 343.228 | 4.2019 | 1 | 4 | 41.05 | 3 | potent |
| CHEMBL433205 | Nc1ccc2c(Nc3cccc(C(F)(F)F)c3)ncnc2c1 | 3.3 | 0.703034 | 304.275 | 3.9744 | 2 | 4 | 63.83 | 2 | potent |
| CHEMBL93051 | Brc1cccc(Nc2ncnc3cc4c(cc23)OCO4)c1 | 15 | 0.764982 | 344.168 | 3.8646 | 1 | 5 | 56.27 | 2 | potent |
| CHEMBL93461 | CC(=O)Nc1ccc2c(Nc3cccc(Br)c3)ncnc2c1 | 40 | 0.740891 | 357.211 | 4.0943 | 2 | 4 | 66.91 | 3 | potent |
| CHEMBL420254 | CCNc1ccc2c(Nc3cccc(Br)c3)ncnc2c1 | 12 | 0.728713 | 343.228 | 4.5677 | 2 | 4 | 49.84 | 4 | potent |
| CHEMBL92985 | Fc1cccc(Nc2ncnc3ccccc23)c1 | 56 | 0.743175 | 239.253 | 3.5125 | 1 | 3 | 37.81 | 2 | potent |
| CHEMBL94431 | COc1cc2ncnc(Nc3cccc(F)c3)c2cc1OC | 3.8 | 0.798384 | 299.305 | 3.5297 | 1 | 5 | 56.27 | 4 | potent |
| CHEMBL328691 | COC(=O)Nc1ccc2ncnc(Nc3cccc(Br)c3)c2c1 | 12 | 0.715468 | 373.21 | 4.3142 | 2 | 5 | 76.14 | 3 | potent |
| CHEMBL317925 | COc1cc2ncnc(Nc3cccc(Br)c3)c2c(OC)c1OC | 0.67 | 0.705908 | 390.237 | 4.1617 | 1 | 6 | 65.5 | 5 | potent |
| CHEMBL53375 | COc1cc2ncnc(Nc3cccc(Br)c3)c2cn1 | 39 | 0.795412 | 331.173 | 3.5395 | 1 | 5 | 59.93 | 3 | potent |
| CHEMBL298637 | CNc1ccc2c(Nc3cccc(Br)c3)ncnc2n1 | 52 | 0.768616 | 330.189 | 3.5726 | 2 | 5 | 62.73 | 3 | potent |
| CHEMBL53062 | COc1cc2c(Nc3cccc(Br)c3)ncnc2cn1 | 2.6 | 0.795412 | 331.173 | 3.5395 | 1 | 5 | 59.93 | 3 | potent |
| CHEMBL54805 | Brc1cccc(Nc2ncnc3cccnc23)c1 | 34 | 0.786423 | 301.147 | 3.5309 | 1 | 4 | 50.7 | 2 | potent |
| CHEMBL291496 | Clc1ccc2ncnc(Nc3cccc(Br)c3)c2n1 | 18 | 0.713658 | 335.592 | 4.1843 | 1 | 4 | 50.7 | 2 | potent |
| CHEMBL52418 | CC(=O)Nc1cc2ncnc(Nc3cccc(Br)c3)c2cn1 | 29 | 0.749321 | 358.199 | 3.4893 | 2 | 5 | 79.8 | 3 | potent |
| CHEMBL296377 | Clc1cc2c(Nc3cccc(Br)c3)ncnc2cn1 | 40 | 0.713658 | 335.592 | 4.1843 | 1 | 4 | 50.7 | 2 | potent |
| CHEMBL52882 | CNC1=CC2N=CN(C)/C(=N\c3cccc(Br)c3)C2C=N1 | 3.1 | 0.894989 | 346.232 | 2.5828 | 1 | 4 | 52.35 | 2 | potent |
| CHEMBL51265 | Brc1cccc(Nc2ncnc3cnccc23)c1 | 51 | 0.786423 | 301.147 | 3.5309 | 1 | 4 | 50.7 | 2 | potent |
| CHEMBL51707 | Fc1cc2ncnc(Nc3cccc(Br)c3)c2cn1 | 13 | 0.732365 | 319.137 | 3.67 | 1 | 4 | 50.7 | 2 | potent |
| CHEMBL52665 | Brc1cccc(Nc2ncnc3ccncc23)c1 | 35 | 0.786423 | 301.147 | 3.5309 | 1 | 4 | 50.7 | 2 | potent |
| CHEMBL54788 | Fc1ccc2ncnc(Nc3cccc(Br)c3)c2n1 | 44 | 0.732365 | 319.137 | 3.67 | 1 | 4 | 50.7 | 2 | potent |
| CHEMBL72393 | Brc1cccc(Nc2ncnc3[nH]c4c(c23)CCCC4)c1 | 46 | 0.727651 | 343.228 | 4.3428 | 2 | 3 | 53.6 | 2 | potent |
| CHEMBL75177 | Clc1cccc(Nc2ncnc3[nH]c4c(c23)CCCC4)c1 | 29 | 0.744031 | 298.777 | 4.2337 | 2 | 3 | 53.6 | 2 | potent |
| CHEMBL306081 | Cc1[nH]c2ncnc(Nc3cccc(Cl)c3)c2c1C | 27 | 0.742041 | 272.739 | 3.97174 | 2 | 3 | 53.6 | 2 | potent |
| CHEMBL74722 | Cc1[nH]c2ncnc(Nc3cccc(Br)c3)c2c1C | 25 | 0.748612 | 317.19 | 4.08084 | 2 | 3 | 53.6 | 2 | potent |
| CHEMBL203644 | CC#CC(=O)Nc1cc2c(Nc3ccc(F)c(Cl)c3)ncnc2cn1 | 0.3 | 0.702559 | 355.76 | 3.5227 | 2 | 5 | 79.8 | 3 | potent |
| CHEMBL203725 | CN1CCC(Oc2cccc3ncnc(Nc4ccc(F)c(Cl)c4)c23)CC1 | 3 | 0.707514 | 386.858 | 4.6389 | 1 | 5 | 50.28 | 4 | potent |
| CHEMBL209343 | CNc1ccc2ncnc(Nc3cccc(Cl)c3)c2c1 | 4 | 0.761114 | 284.75 | 4.0685 | 2 | 4 | 49.84 | 3 | potent |
| CHEMBL208594 | CNc1ccc2ncnc(Nc3cccc(C)c3)c2c1 | 11 | 0.756583 | 264.332 | 3.72352 | 2 | 4 | 49.84 | 3 | potent |
| CHEMBL1203934 | COc1cc2ncnc(Nc3ccc(F)cc3)c2cc1OC.Cl | 51 | 0.781971 | 335.766 | 3.9515 | 1 | 5 | 56.27 | 4 | potent |
| CHEMBL1204360 | COc1cc2ncnc(Nc3ccccc3F)c2cc1OC.Cl | 32.2 | 0.781971 | 335.766 | 3.9515 | 1 | 5 | 56.27 | 4 | potent |
| CHEMBL1203938 | COc1cc2ncnc(NCc3ccc(F)cc3)c2cc1OC.Cl | 47.7 | 0.7585 | 349.793 | 3.82 | 1 | 5 | 56.27 | 5 | potent |
| CHEMBL248044 | COc1cc2ncc(C#N)c(N[C@@H]3C[C@H]3c3ccccc3)c2cc1OC | 90 | 0.754185 | 345.402 | 4.09168 | 1 | 5 | 67.17 | 5 | potent |
| CHEMBL3085374 | COc1cc2ncnc(C#C[C@](C)(O)Cc3ccccc3)c2cc1OC | 9 | 0.734504 | 348.402 | 2.9922 | 1 | 5 | 64.47 | 4 | potent |
| CHEMBL304929 | C#Cc1cccc(Nc2ncnc3cc(OC)c(OC)cc23)c1 | 28.8 | 0.748947 | 305.337 | 3.3719 | 1 | 5 | 56.27 | 4 | potent |
| CHEMBL249919 | OCC#Cc1ccc2ncnc(Nc3ccc(F)c(Cl)c3)c2c1 | 14.1 | 0.707179 | 327.746 | 3.5097 | 2 | 4 | 58.04 | 2 | potent |
| CHEMBL408397 | CN(CCO)c1c(Br)cccc1Nc1ncnc2ccncc12 | 2.63 | 0.71549 | 374.242 | 2.9594 | 2 | 6 | 74.17 | 5 | potent |
| CHEMBL271617 | Nc1cc(Br)ccc1Nc1ncnc2ccncc12 | 25.7 | 0.71046 | 316.162 | 3.1131 | 2 | 5 | 76.72 | 2 | potent |
| CHEMBL258598 | Nc1c(Br)cccc1Nc1ncnc2ccncc12 | 10 | 0.71046 | 316.162 | 3.1131 | 2 | 5 | 76.72 | 2 | potent |
| CHEMBL441333 | COc1c(Br)cccc1Nc1ncnc2ccncc12 | 39.81 | 0.795412 | 331.173 | 3.5395 | 1 | 5 | 59.93 | 3 | potent |
| CHEMBL269889 | Fc1c(Br)cccc1Nc1ncnc2ccncc12 | 13.18 | 0.782892 | 319.137 | 3.67 | 1 | 4 | 50.7 | 2 | potent |
| CHEMBL270921 | CC(=O)Nc1c(Br)cccc1Nc1ncnc2ccncc12 | 29.51 | 0.749321 | 358.199 | 3.4893 | 2 | 5 | 79.8 | 3 | potent |
| CHEMBL258940 | CN1CCC(Nc2ncc3ncnc(Nc4ccc(F)c(Cl)c4)c3n2)CC1 | 3 | 0.709192 | 387.85 | 3.462 | 2 | 7 | 78.86 | 4 | potent |
| CHEMBL188762 | CCC(=O)Nc1ccc2ncnc(Nc3cccc(Br)c3)c2c1 | 0.43 | 0.709544 | 371.238 | 4.4844 | 2 | 4 | 66.91 | 4 | potent |
| CHEMBL500591 | N#Cc1c(N)ncnc1Nc1ccc(OCc2ccccc2)c(Cl)c1 | 27 | 0.722997 | 351.797 | 3.90648 | 2 | 6 | 96.85 | 5 | potent |
| CHEMBL454383 | C=CC(=O)Nc1ccc2ncnc(Cc3cccc(Br)c3)c2c1 | 0.7079 | 0.705567 | 368.234 | 4.1076 | 1 | 3 | 54.88 | 4 | potent |
| CHEMBL522134 | C=CC(=O)Nc1ccc2ncnc(Cc3cccc(C)c3)c2c1 | 0.4169 | 0.748436 | 303.365 | 3.65352 | 1 | 3 | 54.88 | 4 | potent |
| CHEMBL447223 | C=CC(=O)Nc1ccc2ncnc(Cc3ccc(F)c(Cl)c3)c2c1 | 0.7586 | 0.725585 | 341.773 | 4.1376 | 1 | 3 | 54.88 | 4 | potent |
| CHEMBL524117 | C=CC(=O)Nc1ccc2ncnc(Cc3ccc(F)c(Cl)c3)c2n1 | 0.7586 | 0.736381 | 342.761 | 3.5326 | 1 | 4 | 67.77 | 4 | potent |
| CHEMBL446019 | C=CC(=O)Nc1cc2ncnc(Nc3cccc(Cl)c3)c2cn1 | 0.537 | 0.71704 | 325.759 | 3.5463 | 2 | 5 | 79.8 | 4 | potent |
| CHEMBL460735 | C=CC(=O)NC1=CC=C2N=CN=C(Nc3cccc(Cl)c3)C21 | 1.585 | 0.842818 | 312.76 | 2.8921 | 2 | 4 | 65.85 | 3 | potent |
| CHEMBL474147 | C=CC(=O)NC1=CC=C2N=CN=C(Nc3cccc(C)c3)C21 | 0.4169 | 0.840799 | 292.342 | 2.54712 | 2 | 4 | 65.85 | 3 | potent |
| CHEMBL474342 | C=CC(=O)NC1=CC=C2N=CN=C(Nc3cccc(C(F)(F)F)c3)C21 | 0.912 | 0.825308 | 346.312 | 3.2575 | 2 | 4 | 65.85 | 3 | potent |
| CHEMBL474343 | C=CC(=O)NC1=CC=C2N=CN=C(Nc3ccc(Oc4ccccc4)cc3)C21 | 5.754 | 0.78048 | 370.412 | 4.031 | 2 | 5 | 75.08 | 5 | potent |
| CHEMBL472746 | C=CC(=O)NC1=CC=C2N=CN=C(Nc3ccc(OCc4ccccc4)cc3)C21 | 3.631 | 0.743773 | 384.439 | 3.8177 | 2 | 5 | 75.08 | 6 | potent |
| CHEMBL516022 | C=CC(=O)NC1=NC=C2N=CN=C(Nc3cccc(C)c3)C21 | 0.4786 | 0.818226 | 293.33 | 2.01922 | 2 | 5 | 78.21 | 2 | potent |
| CHEMBL474141 | C=CC(=O)NC1=NC=C2N=CN=C(Nc3ccc(F)c(Br)c3)C21 | 0.7244 | 0.778835 | 376.189 | 2.6124 | 2 | 5 | 78.21 | 2 | potent |
| CHEMBL516373 | C=CC(=O)NC1=NC=C2N=CN=C(Nc3ccc(F)c(Cl)c3)C21 | 0.7762 | 0.816674 | 331.738 | 2.5033 | 2 | 5 | 78.21 | 2 | potent |
| CHEMBL447331 | Brc1cccc(Nc2ncnc3cc4c(cc23)CN4)c1 | 0.4365 | 0.745146 | 327.185 | 4.0614 | 2 | 4 | 49.84 | 2 | potent |
| CHEMBL489112 | CN1Cc2cc3c(Nc4cccc(Br)c4)ncnc3cc21 | 0.7943 | 0.762417 | 341.212 | 4.0857 | 1 | 4 | 41.05 | 2 | potent |
| CHEMBL489117 | CN(C)CCN1Cc2cc3c(Nc4cccc(Br)c4)ncnc3cc21 | 40.74 | 0.703603 | 398.308 | 4.0175 | 1 | 5 | 44.29 | 5 | potent |
| CHEMBL489308 | O=C(O)CN1Cc2cc3c(Nc4cccc(Br)c4)ncnc3cc21 | 5.129 | 0.715515 | 385.221 | 3.5405 | 2 | 5 | 78.35 | 4 | potent |
| CHEMBL589588 | COc1ccc(NC(=O)c2ccc(N(CCCl)CCCl)cc2)cc1 | 80 | 0.710247 | 367.276 | 4.2315 | 1 | 3 | 41.57 | 8 | potent |
| CHEMBL592617 | N#CCC(=O)Nc1ccc2ncnc(Nc3cccc(Br)c3)c2c1 | 0.17 | 0.712226 | 382.221 | 3.98808 | 2 | 5 | 90.7 | 4 | potent |
| CHEMBL597948 | C#CCOc1cc2c(Nc3cccc(Cl)c3)ncnc2cc1OC | 25.9 | 0.710657 | 339.782 | 4.0474 | 1 | 5 | 56.27 | 5 | potent |
| CHEMBL1092250 | C#Cc1cccc(Nc2ccnc3cc(OC)c(OC)cc23)c1 | 4 | 0.740513 | 304.349 | 3.9769 | 1 | 4 | 43.38 | 4 | potent |
| CHEMBL1171792 | Cc1ccc(Br)c2c(C#N)cc(C(=O)C3CC3)n12 | 85 | 0.797379 | 303.159 | 3.4746 | 0 | 3 | 45.27 | 2 | potent |
| CHEMBL1173814 | COc1ccc(C2CC(c3ccc(C)c(C)c3)=NN2C(N)=S)cc1 | 70 | 0.866336 | 339.464 | 3.70674 | 1 | 3 | 50.85 | 3 | potent |
| CHEMBL1241581 | COc1cc(-c2nn(C3CCCC3)c3ncnc(N)c23)ccc1N | 84 | 0.717752 | 324.388 | 2.7814 | 2 | 7 | 104.87 | 3 | potent |
| CHEMBL1241676 | Nc1ncnc2c1c(-c1ccc(Cl)c(O)c1)nn2C1CCCC1 | 67 | 0.750009 | 329.791 | 3.5496 | 2 | 6 | 89.85 | 2 | potent |
| CHEMBL1272222 | C=CC(=O)N1CCc2c(sc3ncnc(N[C@H](C)c4ccccc4)c23)C1 | 20 | 0.712696 | 364.474 | 3.9351 | 1 | 5 | 58.12 | 4 | potent |
| CHEMBL1645474 | NC1CCN(Cc2ccn3ncnc(Nc4cccc(Br)c4)c23)CC1 | 6 | 0.702976 | 401.312 | 3.1585 | 2 | 6 | 71.48 | 4 | potent |
| CHEMBL1645473 | NC1CCN(Cc2ccn3ncnc(Nc4cccc(Cl)c4)c23)CC1 | 9 | 0.751386 | 356.861 | 3.0494 | 2 | 6 | 71.48 | 4 | potent |
| CHEMBL1645466 | C#Cc1cccc(Nc2ncnn3ccc(CN4CCC(N)CC4)c23)c1 | 10 | 0.709886 | 346.438 | 2.3773 | 2 | 6 | 71.48 | 4 | potent |
| CHEMBL1645476 | NC1CCN(Cc2ccn3ncnc(Nc4ccc(F)c(Cl)c4)c23)CC1 | 10 | 0.733447 | 374.851 | 3.1885 | 2 | 6 | 71.48 | 4 | potent |
| CHEMBL1645470 | Cc1cccc(Nc2ncnn3ccc(CN4CCC(N)CC4)c23)c1 | 20 | 0.766371 | 336.443 | 2.70442 | 2 | 6 | 71.48 | 4 | potent |
| CHEMBL1645472 | NC1CCN(Cc2ccn3ncnc(Nc4cccc(F)c4)c23)CC1 | 32 | 0.763606 | 340.406 | 2.5351 | 2 | 6 | 71.48 | 4 | potent |
| CHEMBL1645467 | NC1CCN(Cc2ccn3ncnc(Nc4ccccc4)c23)CC1 | 40 | 0.771593 | 322.416 | 2.396 | 2 | 6 | 71.48 | 4 | potent |
| CHEMBL1645471 | Cc1ccc(Nc2ncnn3ccc(CN4CCC(N)CC4)c23)cc1 | 50 | 0.766371 | 336.443 | 2.70442 | 2 | 6 | 71.48 | 4 | potent |
| CHEMBL242541 | Nc1ccc2ncnc(Nc3ccc(F)c(Cl)c3)c2c1 | 29 | 0.705024 | 288.713 | 3.7481 | 2 | 4 | 63.83 | 2 | potent |
| CHEMBL1945448 | O=C(NS(=O)(=O)c1ccc(Cl)cc1)c1cncc(Br)c1 | 90 | 0.894505 | 375.631 | 2.6162 | 1 | 4 | 76.13 | 3 | potent |
| CHEMBL1198361 | Brc1cccc(Nc2ncnc3cc4c(cc23)OCCCO4)c1 | 85 | 0.727154 | 372.222 | 4.2972 | 1 | 5 | 56.27 | 2 | potent |
| CHEMBL2087353 | Brc1cccc(Nc2ncnc3cc4c(cc23)OCCOCCO4)c1 | 55 | 0.701142 | 402.248 | 3.9237 | 1 | 6 | 65.5 | 2 | potent |
| CHEMBL2441568 | Fc1ccc(Nc2ncnc3cc4c(cc23)NCCO4)cc1Cl | 1.29 | 0.744236 | 330.75 | 3.9702 | 2 | 5 | 59.07 | 2 | potent |
| CHEMBL3297894 | Cc1nc(Nc2ccc(F)c(Cl)c2)c2cc(C)oc2n1 | 30.2 | 0.761226 | 291.713 | 4.37574 | 1 | 4 | 50.95 | 2 | potent |
| CHEMBL3297892 | C#Cc1cccc(Nc2nc(C)nc3oc(C)cc23)c1 | 30 | 0.718081 | 263.3 | 3.56454 | 1 | 4 | 50.95 | 2 | potent |
| CHEMBL3297898 | COc1ccc(N(C)c2nc(C)nc3oc(C)cc23)cc1 | 68.2 | 0.734535 | 283.331 | 3.61614 | 0 | 5 | 51.39 | 3 | potent |
| CHEMBL3297897 | COc1ccc(Nc2nc(C)nc3oc(C)cc23)cc1 | 42.2 | 0.786919 | 269.304 | 3.59184 | 1 | 5 | 60.18 | 3 | potent |
| CHEMBL3298000 | COc1ccc(N(C)c2nc(C)nc3oc(C)cc23)cc1.Cl | 82.3 | 0.728971 | 319.792 | 4.03794 | 0 | 5 | 51.39 | 3 | potent |
| CHEMBL3297999 | COc1ccc(N(c2nc(C)nc3oc(C)cc23)C(C)C)cc1 | 84.4 | 0.714743 | 311.385 | 4.39474 | 0 | 5 | 51.39 | 4 | potent |
| CHEMBL3297899 | CCN(c1ccc(OC)cc1)c1nc(C)nc2oc(C)cc12 | 70.7 | 0.728053 | 297.358 | 4.00624 | 0 | 5 | 51.39 | 4 | potent |
| CHEMBL3403510 | COc1ccc(N(C)c2nc(C)nc3oc(C)cc23)cc1OC | 90.3 | 0.732849 | 313.357 | 3.62474 | 0 | 6 | 60.62 | 4 | potent |
| CHEMBL3403517 | COc1ccc2c(c1)CCCN2c1nc(C)nc2oc(C)cc12 | 3.4 | 0.717581 | 309.369 | 3.93254 | 0 | 5 | 51.39 | 2 | potent |
| CHEMBL3416439 | C#Cc1cccc(Nc2ncnc3sc(Br)cc23)c1 | 23 | 0.716529 | 330.21 | 4.1787 | 1 | 4 | 37.81 | 2 | potent |
| CHEMBL3416438 | Fc1ccc(Nc2ncnc3sc(Br)cc23)cc1Cl | 53 | 0.701062 | 358.623 | 4.9899 | 1 | 4 | 37.81 | 2 | potent |
| CHEMBL3416621 | Brc1cc2c(Nc3ccccc3)ncnc2s1 | 80 | 0.770912 | 306.188 | 4.1974 | 1 | 4 | 37.81 | 2 | potent |
| CHEMBL3416605 | OCC(Nc1ncnc2sc(Br)cc12)c1ccccc1 | 83 | 0.754946 | 350.241 | 3.5993 | 2 | 5 | 58.04 | 4 | potent |
| CHEMBL3416603 | OC[C@@H](Nc1ncnc2sc(Br)cc12)c1ccccc1 | 36 | 0.754946 | 350.241 | 3.5993 | 2 | 5 | 58.04 | 4 | potent |
| CHEMBL3416600 | C[C@@H](Nc1ncnc2sc(Br)cc12)c1ccccc1 | 38 | 0.758979 | 334.242 | 4.6269 | 1 | 4 | 37.81 | 3 | potent |
| CHEMBL3623279 | COc1cc2ncnc(Nc3cccc(Cl)c3F)c2cc1N1CCOCC1 | 1.5 | 0.728317 | 388.83 | 4.0111 | 1 | 6 | 59.51 | 4 | potent |
| CHEMBL3623283 | COc1cc2ncnc(Nc3ccc(F)c(Cl)c3)c2cc1N1CCOCC1 | 1.5 | 0.728317 | 388.83 | 4.0111 | 1 | 6 | 59.51 | 4 | potent |
| CHEMBL1688539 | Fc1ccc(Nc2ncnc3ccccc23)cc1Cl | 30 | 0.761527 | 273.698 | 4.1659 | 1 | 3 | 37.81 | 2 | potent |
| CHEMBL3752008 | O=C(Nc1ccncc1)Nc1cc(-c2cncnc2)cc(C(F)(F)F)c1 | 14.83 | 0.734435 | 359.311 | 4.2014 | 2 | 4 | 79.8 | 3 | potent |
| CHEMBL3752370 | O=C(Nc1ccncc1)Nc1cc(-c2cncnc2)ccc1OC(F)(F)F | 18.04 | 0.717262 | 375.31 | 4.0812 | 2 | 5 | 89.03 | 4 | potent |
| CHEMBL3754556 | O=C(Nc1cc(-c2cncnc2)cc(C(F)(F)F)c1)Nc1nccs1 | 71.82 | 0.726677 | 365.34 | 4.2629 | 2 | 5 | 79.8 | 3 | potent |
| CHEMBL3752248 | O=C(Nc1nccs1)Nc1cc(-c2cncnc2)ccc1OC(F)(F)F | 71.71 | 0.708962 | 381.339 | 4.1427 | 2 | 6 | 89.03 | 4 | potent |
| CHEMBL3752825 | Cn1cnc(-c2ccc(OC(F)(F)F)c(NC(=O)Nc3ccncc3)c2)c1 | 94.82 | 0.719509 | 377.326 | 4.0247 | 2 | 5 | 81.07 | 4 | potent |
| CHEMBL3754057 | O=C(Nc1ccccn1)Nc1cc(-c2cncnc2)ccc1OC(F)(F)F | 26.56 | 0.717262 | 375.31 | 4.0812 | 2 | 5 | 89.03 | 4 | potent |
| CHEMBL3752074 | COc1cc(NC(=O)Nc2ccccn2)cc(-c2cccnc2)c1OC | 48.81 | 0.730829 | 350.378 | 3.8048 | 2 | 5 | 85.37 | 5 | potent |
| CHEMBL3805509 | C#Cc1cccc(Nc2ncnc3cc(OC(C)C)c4c(c23)OCCO4)c1 | 23.7 | 0.710896 | 361.401 | 3.9131 | 1 | 6 | 65.5 | 4 | potent |
| CHEMBL3805859 | CCOc1cc2ncnc(Nc3ccc(C)cc3)c2c2c1OCCO2 | 3.6 | 0.779903 | 337.379 | 3.85172 | 1 | 6 | 65.5 | 4 | potent |
| CHEMBL3804868 | CCOc1cc2ncnc(Nc3ccc(C)c(Cl)c3)c2c2c1OCCO2 | 6.7 | 0.727721 | 371.824 | 4.50512 | 1 | 6 | 65.5 | 4 | potent |
| CHEMBL3805774 | CCOc1cc2ncnc(Nc3cccc(OC)c3)c2c2c1OCCO2 | 4.4 | 0.7516 | 353.378 | 3.5519 | 1 | 7 | 74.73 | 5 | potent |
| CHEMBL3805039 | C#Cc1cccc(Nc2ncnc3cc(OCC)c4c(c23)OCCO4)c1 | 9.2 | 0.728603 | 347.374 | 3.5246 | 1 | 6 | 65.5 | 4 | potent |
| CHEMBL3806248 | CCOc1cc2ncnc(Nc3ccc(F)c(Cl)c3)c2c2c1OCCO2 | 2 | 0.73155 | 375.787 | 4.3358 | 1 | 6 | 65.5 | 4 | potent |
| CHEMBL3805236 | C#Cc1cccc(Nc2ncnc3cc(OC)c4c(c23)OCCO4)c1 | 10.9 | 0.74301 | 333.347 | 3.1345 | 1 | 6 | 65.5 | 3 | potent |
| CHEMBL3806292 | COc1cc2ncnc(Nc3ccc(F)c(Cl)c3)c2c2c1OCCO2 | 22.5 | 0.761745 | 361.76 | 3.9457 | 1 | 6 | 65.5 | 3 | potent |
| CHEMBL2031296 | CC(=O)Nc1ccc2ncnc(Nc3cccc(Br)c3)c2c1 | 1.01 | 0.740891 | 357.211 | 4.0943 | 2 | 4 | 66.91 | 3 | potent |
| CHEMBL3815074 | C#Cc1cccc(Nc2ncnc3ccc(NC(C)=O)cc23)c1 | 2.04 | 0.728403 | 302.337 | 3.3131 | 2 | 4 | 66.91 | 3 | potent |
| CHEMBL3814257 | CC(=O)Nc1ccc2ncnc(Nc3ccc(F)c(Cl)c3)c2c1 | 0.662 | 0.757596 | 330.75 | 4.1243 | 2 | 4 | 66.91 | 3 | potent |
| CHEMBL3906533 | CCOC(=O)c1ccc(Nc2nncc3ccccc23)cc1 | 4.4 | 0.745194 | 293.326 | 3.5501 | 1 | 5 | 64.11 | 4 | potent |
| CHEMBL3937949 | O=C(O)c1ccc(Nc2nncc3ccccc23)cc1 | 6.2 | 0.760786 | 265.272 | 3.0716 | 2 | 4 | 75.11 | 3 | potent |
| CHEMBL3915508 | N#Cc1ccc(Nc2nncc3ccccc23)cc1 | 4.1 | 0.753557 | 246.273 | 3.24508 | 1 | 4 | 61.6 | 2 | potent |
| CHEMBL3979610 | Fc1ccc(Nc2nncc3ccccc23)cc1 | 6 | 0.743175 | 239.253 | 3.5125 | 1 | 3 | 37.81 | 2 | potent |
| CHEMBL3938794 | O=C1CS/C(=N/Nc2nncc3ccccc23)N1 | 51 | 0.791533 | 259.294 | 1.1757 | 2 | 6 | 79.27 | 2 | potent |
| CHEMBL3893698 | CCN1C(=O)CS/C1=N/Nc1nncc2ccccc12 | 47 | 0.873169 | 287.348 | 1.908 | 1 | 6 | 70.48 | 3 | potent |
| CHEMBL3921710 | CCCCN1C(=O)CS/C1=N/Nc1nncc2ccccc12 | 23 | 0.859061 | 315.402 | 2.6882 | 1 | 6 | 70.48 | 5 | potent |
| CHEMBL3982619 | O=C1CS/C(=N/Nc2nncc3ccccc23)N1c1ccccc1 | 45 | 0.744898 | 335.392 | 3.0927 | 1 | 6 | 70.48 | 3 | potent |
| CHEMBL3912723 | O=C1CS/C(=N/Nc2nncc3ccccc23)N1c1ccc(Cl)cc1 | 42 | 0.711867 | 369.837 | 3.7461 | 1 | 6 | 70.48 | 3 | potent |
| CHEMBL3974626 | COc1ccc(N2C(=O)CS/C2=N/Nc2nncc3ccccc23)cc1 | 36 | 0.715872 | 365.418 | 3.1013 | 1 | 7 | 79.71 | 4 | potent |
| CHEMBL3133904 | C=CC(=O)Nc1ccc2ncnc(Nc3cccc(C)c3F)c2c1 | 1.5 | 0.713912 | 322.343 | 3.94542 | 2 | 4 | 66.91 | 4 | potent |
| CHEMBL4083642 | Cc1nc(C)c(/C=C2\CN(C)C/C(=C\c3nc(C)c(C)nc3C)C2=O)nc1C | 40 | 0.749101 | 377.492 | 3.09862 | 0 | 6 | 71.87 | 2 | potent |
| CHEMBL4099713 | C=CC(=O)N1CCC[C@@H](n2nc(-c3ccccc3)c3c(N)ncnc32)C1 | 10 | 0.734288 | 348.41 | 2.425 | 1 | 6 | 89.93 | 3 | potent |
| CHEMBL4100655 | C=CC(=O)N1CCC[C@@H](n2nc(-c3cccc(F)c3)c3c(N)ncnc32)C1 | 10 | 0.719708 | 366.4 | 2.5641 | 1 | 6 | 89.93 | 3 | potent |
| CHEMBL4062509 | C=CC(=O)N1CCC[C@@H](n2nc(-c3ccc(F)cc3)c3c(N)ncnc32)C1 | 30 | 0.719708 | 366.4 | 2.5641 | 1 | 6 | 89.93 | 3 | potent |
| CHEMBL4064224 | C=CC(=O)Nc1cccc(-c2c[nH]c3nccc(Cl)c23)c1 | 67.9 | 0.717704 | 297.745 | 4.0078 | 2 | 2 | 57.78 | 3 | potent |
| CHEMBL4214567 | O=C(Nc1nccs1)C(c1cc(F)ccc1O)N1Cc2ccccc2C1=O | 3 | 0.724063 | 383.404 | 3.3236 | 2 | 5 | 82.53 | 4 | potent |
| CHEMBL4245415 | Cc1coc2ncnc(N(C)c3ccc(N(C)C)cc3)c12 | 3.1 | 0.736737 | 282.347 | 3.36512 | 0 | 5 | 45.4 | 3 | potent |
| CHEMBL4250210 | CNc1ccc(N(C)c2ncnc3occ(C)c23)cc1 | 6.4 | 0.78917 | 268.32 | 3.34082 | 1 | 5 | 54.19 | 3 | potent |
| CHEMBL4242522 | CCc1ccc(N(C)c2ncnc3occ(C)c23)cc1 | 4 | 0.722276 | 267.332 | 3.86152 | 0 | 4 | 42.16 | 3 | potent |
| CHEMBL4237916 | CCCN(c1ccc(OC)cc1)c1ncnc2occ(C)c12 | 7.1 | 0.709697 | 297.358 | 4.08792 | 0 | 5 | 51.39 | 5 | potent |
| CHEMBL4250273 | COc1ccc(N(c2ncnc3occ(C)c23)C(C)C)cc1 | 10.1 | 0.725764 | 297.358 | 4.08632 | 0 | 5 | 51.39 | 4 | potent |
| CHEMBL4241638 | CCN(c1ccc(OC)cc1)c1ncnc2occ(C)c12 | 92.5 | 0.730437 | 283.331 | 3.69782 | 0 | 5 | 51.39 | 4 | potent |
| CHEMBL4250191 | COc1ccc(N(C)c2ncnc3occ(C)c23)cc1 | 15.5 | 0.729781 | 269.304 | 3.30772 | 0 | 5 | 51.39 | 3 | potent |
| CHEMBL4283823 | COc1ccc(Nc2cc(NC(=O)c3ccccc3)ncn2)cc1 | 81 | 0.752464 | 320.352 | 3.4811 | 2 | 5 | 76.14 | 5 | potent |
| CHEMBL4282460 | O=C(O)CCCC(=O)Nc1cc(Nc2cccc(Cl)c2)ncn1 | 27 | 0.718461 | 334.763 | 3.067 | 3 | 5 | 104.21 | 7 | potent |
| CHEMBL4283970 | O=C(O)CCCC(=O)Nc1cc(N2CCOCC2)ncn1 | 53 | 0.78703 | 294.311 | 0.5066 | 2 | 6 | 104.65 | 6 | potent |
| CHEMBL1379917 | O=C(Nc1cc(N2CCOCC2)ncn1)c1ccc(F)cc1 | 63 | 0.934546 | 302.309 | 1.7046 | 1 | 5 | 67.35 | 3 | potent |
| CHEMBL4284413 | O=C(Nc1nccs1)C(c1ccccc1)N1Cc2ccccc2C1=O | 24 | 0.784298 | 349.415 | 3.4789 | 1 | 4 | 62.3 | 4 | potent |
| CHEMBL4280817 | O=C1CSC(N2N=C(c3ccncc3)CC2c2ccc(Br)cc2)=N1 | 9 | 0.771495 | 401.289 | 3.6246 | 0 | 5 | 57.92 | 2 | potent |
| CHEMBL4281426 | O=C1Nc2ccc(S(=O)(=O)N3CCOCC3)cc2/C1=N/Nc1ccccc1 | 46 | 0.775511 | 386.433 | 1.4758 | 2 | 6 | 100.1 | 4 | potent |
| CHEMBL4441392 | Cc1cc(=O)n2nc(SCc3ccc(F)cc3)nc2[nH]1 | 56 | 0.75081 | 290.323 | 2.15742 | 1 | 5 | 63.05 | 3 | potent |
| CHEMBL4456976 | Cc1cc(=O)n2nc(SCc3ccc(C(C)C)cc3)nc2[nH]1 | 62 | 0.751491 | 314.414 | 3.14172 | 1 | 5 | 63.05 | 4 | potent |
| CHEMBL4435632 | Cc1cc(=O)n2nc(SCc3cccc(C(F)(F)F)c3)nc2[nH]1 | 84 | 0.744608 | 340.33 | 3.03712 | 1 | 5 | 63.05 | 3 | potent |
| CHEMBL4550473 | Cc1cc(=O)n2nc(SCc3cccc(Cl)c3)nc2[nH]1 | 59 | 0.755697 | 306.778 | 2.67172 | 1 | 5 | 63.05 | 3 | potent |
| CHEMBL4567599 | Cc1cc(=O)n2nc(SCc3ccc(C(C)(C)C)cc3)nc2[nH]1 | 86 | 0.749277 | 328.441 | 3.31582 | 1 | 5 | 63.05 | 3 | potent |
| CHEMBL3818535 | Cc1cc(=O)n2nc(SCc3ccc(Cl)cc3)nc2[nH]1 | 54 | 0.755697 | 306.778 | 2.67172 | 1 | 5 | 63.05 | 3 | potent |
| CHEMBL4440586 | C#Cc1cccc(Nc2c(C#N)cnc3cc(OC)c(OC)cc23)c1 | 61 | 0.736502 | 329.359 | 3.84858 | 1 | 5 | 67.17 | 4 | potent |
| CHEMBL111038 | COc1cc2ncc(C#N)c(Nc3cccc(Br)c3)c2cc1OC | 90 | 0.710566 | 384.233 | 4.62978 | 1 | 5 | 67.17 | 4 | potent |
| CHEMBL4520903 | O=C1c2ccccc2Nc2ccc(F)cc2N1Cc1ccccc1 | 59 | 0.740642 | 318.351 | 4.7297 | 1 | 2 | 32.34 | 2 | potent |
| CHEMBL4452106 | O=C(Nc1nccs1)[C@@H](c1cc(F)ccc1O)N1Cc2ccccc2C1=O | 4.7 | 0.724063 | 383.404 | 3.3236 | 2 | 5 | 82.53 | 4 | potent |
| CHEMBL4582195 | O=C(CSC(=S)N1CCCCC1)Nc1cccc(NC(=O)c2ccccn2)c1 | 84 | 0.725657 | 414.556 | 3.7764 | 2 | 5 | 74.33 | 5 | potent |
| CHEMBL1619395 | CCN1CCN(CC(=O)Nc2cc(C)on2)CC1 | 81 | 0.848071 | 252.318 | 0.55902 | 1 | 5 | 61.61 | 4 | potent |
| CHEMBL4740108 | Cc1cc(NC(=O)CN2CCN(c3ccccc3)CC2)no1 | 64 | 0.931754 | 300.362 | 1.74372 | 1 | 5 | 61.61 | 4 | potent |
| CHEMBL4755651 | CC(C)(C)c1cc(NC(=O)CN2CCN(c3ccccc3)CC2)no1 | 66 | 0.925616 | 342.443 | 2.7328 | 1 | 5 | 61.61 | 4 | potent |
| CHEMBL4755988 | Cc1cc(NC2=NC(=O)CS2)no1 | 81 | 0.727684 | 197.219 | 1.02432 | 1 | 5 | 67.49 | 1 | potent |
| CHEMBL492399 | COc1ccc(N(C)c2nc(C)nc3ccccc23)cc1 | 2.8 | 0.732184 | 279.343 | 3.71472 | 0 | 4 | 38.25 | 3 | potent |
| CHEMBL2420866 | COc1ccc2c(c1)CCCN2c1nc(C)nc2ccccc12 | 5 | 0.716214 | 305.381 | 4.03112 | 0 | 4 | 38.25 | 2 | potent |
| CHEMBL3604205 | COc1ccc2c(c1)CCCN2c1ncnc2ccccc12 | 48.9 | 0.72096 | 291.354 | 3.7227 | 0 | 4 | 38.25 | 2 | potent |
| CHEMBL4453068 | C#Cc1cccc(Nc2ncnc3cc4c(cc23)OCCO4)c1 | 48.7 | 0.737147 | 303.321 | 3.1259 | 1 | 5 | 56.27 | 2 | potent |
| CHEMBL4750375 | C#Cc1cccc(Nc2ncnc3cc4c(cc23)OCCO4)c1F | 19.7 | 0.734284 | 321.311 | 3.265 | 1 | 5 | 56.27 | 2 | potent |
| CHEMBL4743464 | N#Cc1cccc(Nc2ncnc3cc4c(cc23)OCCO4)c1F | 22 | 0.780458 | 322.299 | 3.15538 | 1 | 6 | 80.06 | 2 | potent |
| CHEMBL4744655 | Fc1c(Cl)cccc1Nc1ncnc2cc3c(cc12)OCCO3 | 3.91 | 0.770557 | 331.734 | 3.9371 | 1 | 5 | 56.27 | 2 | potent |
| CHEMBL4743220 | Fc1c(Br)cccc1Nc1ncnc2cc3c(cc12)OCCO3 | 2.49 | 0.731629 | 376.185 | 4.0462 | 1 | 5 | 56.27 | 2 | potent |
| CHEMBL4778159 | N#Cc1cccc(Nc2ncnc3cc4c(cc23)OCCO4)c1 | 24 | 0.783597 | 304.309 | 3.01628 | 1 | 6 | 80.06 | 2 | potent |
| CHEMBL4740063 | Clc1cccc(Nc2ncnc3cc4c(cc23)OCCO4)c1 | 6.41 | 0.779607 | 313.744 | 3.798 | 1 | 5 | 56.27 | 2 | potent |
| CHEMBL1198370 | Brc1cccc(Nc2ncnc3cc4c(cc23)OCCO4)c1 | 13.6 | 0.752929 | 358.195 | 3.9071 | 1 | 5 | 56.27 | 2 | potent |
| CHEMBL4791756 | Fc1ccc(Br)cc1Nc1ncnc2cc3c(cc12)OCCO3 | 7.63 | 0.731629 | 376.185 | 4.0462 | 1 | 5 | 56.27 | 2 | potent |
| CHEMBL4749501 | Fc1cccc(Nc2ncnc3cc4c(cc23)OCCO4)c1F | 18.9 | 0.785052 | 315.279 | 3.4228 | 1 | 5 | 56.27 | 2 | potent |
| CHEMBL4871569 | Cc1nc2c(Br)cc(Br)cc2c(=O)n1N | 72 | 0.749928 | 332.983 | 1.94372 | 1 | 4 | 60.91 | 0 | potent |
| CHEMBL1714813 | COc1cc2ncnc(N[C@H](C)c3ccccc3)c2cc1OC | 1 | 0.776195 | 309.369 | 3.8201 | 1 | 5 | 56.27 | 5 | potent |
| CHEMBL5181237 | Brc1cccc(Nc2ncnc3[nH]ccc23)c1 | 3.76 | 0.759232 | 289.136 | 3.464 | 2 | 3 | 53.6 | 2 | potent |
| CHEMBL5207949 | Clc1ccc(Nc2ncnc3[nH]ccc23)cc1Br | 3.63 | 0.745726 | 323.581 | 4.1174 | 2 | 3 | 53.6 | 2 | potent |
| CHEMBL5198368 | CC1=NNC2=NC(=O)NC(c3ccccc3Br)C12 | 90 | 0.835161 | 307.151 | 2.2072 | 2 | 3 | 65.85 | 1 | potent |
| CHEMBL5208825 | COC(=O)CCc1nc2ccc(Br)cc2[nH]c1=O | 75.42 | 0.877326 | 311.135 | 1.7912 | 1 | 4 | 72.05 | 3 | potent |
| CHEMBL5206400 | COC(=O)CCc1nc2ccc(Cl)cc2[nH]c1=O | 82.76 | 0.858223 | 266.684 | 1.6821 | 1 | 4 | 72.05 | 3 | potent |
| CHEMBL5195669 | O=C(Nc1nccs1)C(c1n[nH]c2c1CCC2)N1Cc2ccccc2C1=O | 23 | 0.729132 | 379.445 | 2.6907 | 2 | 5 | 90.98 | 4 | potent |
| CHEMBL5203388 | O=C(Nc1nccs1)C(c1ncn2c1CCC2)N1Cc2ccccc2C1=O | 16 | 0.75567 | 379.445 | 2.6216 | 1 | 6 | 80.12 | 4 | potent |
| CHEMBL5173979 | O=C(Nc1nccs1)C(c1ncn2c1CCC2)N1Cc2c(Cl)cccc2C1=O | 4 | 0.711373 | 413.89 | 3.275 | 1 | 6 | 80.12 | 4 | potent |
| CHEMBL5201532 | COc1cc(/C=C/S(=O)(=O)c2ccccc2)cc(OC)c1OC | 7.85 | 0.811905 | 334.393 | 3.157 | 0 | 5 | 61.83 | 6 | potent |
| CHEMBL5192793 | COc1ccc(-c2cc(=O)cc(-c3ccc(OC)cc3)o2)cc1 | 0.15 | 0.730937 | 308.333 | 3.991 | 0 | 4 | 48.67 | 4 | potent |
| CHEMBL5185036 | CCc1ccc(C2=C(O)C(=O)C(c3ccc(CC)cc3)=C(O)C2=O)cc1 | 30.18 | 0.812146 | 348.398 | 4.2016 | 2 | 4 | 74.6 | 4 | potent |
| CHEMBL5180830 | O=C1c2cc(F)ccc2Nc2ccccc2N1Cc1ccccc1 | 52 | 0.740642 | 318.351 | 4.7297 | 1 | 2 | 32.34 | 2 | potent |
| CHEMBL268501 | Cc1ccc2c(-c3ccccc3)nc(=O)n(C(C)C)c2c1 | 2 | 0.711032 | 278.355 | 3.95282 | 0 | 3 | 34.89 | 2 | potent |
| CHEMBL5269391 | Fc1ccc(Nc2ncnc3ccc4c(c23)OCCN4)cc1Cl | 87.27 | 0.744236 | 330.75 | 3.9702 | 2 | 5 | 59.07 | 2 | potent |
| CHEMBL5269684 | CC(=O)N1CCOc2c1ccc1ncnc(Nc3ccc(F)c(Cl)c3)c21 | 47.22 | 0.738299 | 372.787 | 3.9112 | 1 | 5 | 67.35 | 2 | potent |
| CHEMBL5275916 | CC(=O)N1CCOc2c1ccc1ncnc(Nc3cccc(Br)c3)c21 | 45.6 | 0.70862 | 399.248 | 3.8812 | 1 | 5 | 67.35 | 2 | potent |
| CHEMBL5278452 | CCC(=O)N1CCOc2c1ccc1ncnc(Nc3ccc(F)c(Cl)c3)c21 | 70.61 | 0.726432 | 386.814 | 4.3013 | 1 | 5 | 67.35 | 3 | potent |
| CHEMBL5280144 | Cc1c(C(=O)NCCc2ccc(F)cc2)[nH]c2cc(F)ccc12 | 98 | 0.757097 | 314.335 | 3.72702 | 2 | 1 | 44.89 | 4 | potent |
| CHEMBL188522 | Cc1ccc(Nc2ncnn3ccc(C)c23)cc1O | 66 | 0.737818 | 254.293 | 2.79534 | 2 | 5 | 62.45 | 2 | potent |
| CHEMBL186001 | Cc1ccc(Nc2ncnn3cc(C)c(C)c23)cc1O | 23 | 0.749338 | 268.32 | 3.10376 | 2 | 5 | 62.45 | 2 | potent |
| CHEMBL5425121 | c1ccc2c(c1)CCN2c1ncnc2cc3c(cc12)NCN3CCN1CCCC1 | 32 | 0.739214 | 386.503 | 3.6092 | 1 | 6 | 47.53 | 4 | potent |
